# Supplementary material
Source: ML conference proceedings conference paper supplement (https://openreview.net/forum?id=RY0yYsTxGM)
Supplement: supplementary_material [file attachment]

## A APPENDIX

### A.1 MODEL INITIAL INPUT

Given an input graph  $G(V, E, P)$ , our objective is to determine the input node feature matrix  $X$  and spatial positional encoding  $S$  utilizing Equation 3. In this section, we present the methodology for obtaining  $X$ . For the atomic-level approach, we initially obtain the node embedding from the pre-trained Uni-Mol model Zhou et al. (2023). Since Uni-Mol solely incorporates atom type information, we manually augment the node features with additional attributes and concatenate them accordingly.

| number | feature    | range   |
|--------|------------|---------|
| 1      | chirality  | [0, 3]  |
| 2      | charge     | [0, 10] |
| 3      | hyb        | [0, 6]  |
| 4      | numH       | [0, 8]  |
| 5      | valence    | [0, 7]  |
| 6      | degree     | [0, 10] |
| 7      | aromatic   | [0, 1]  |
| 8      | is_protein | [0, 1]  |

Table 2: Node feature table
